# Supplementary material
Source: PubMed Central journal article supplement (PMC3512407)

*Supplementary material*

*for*

**Phosphatidylinositol 4-kinase II $\alpha$  function at endosomes regulated by the  
ubiquitin ligase Itch**

Julia Mössinger, Marnix Wieffer, Eberhard Krause, Christian Freund, Fabian Gerth, Michael  
Krauss and Volker Haucke

*Supplementary materials and methods*

**Plasmids**

Full-length murine PI4KII $\alpha$  was cloned into pGEX4T-1 (Amersham Biosciences) or pET28a+ (Novagen) for bacterial expression or a pcDNA3-based plasmid encoding an in-frame fusion with the HA epitope tag for expression in mammalian cells. Full-length human Itch was cloned into pET28a+. Itch-WW domains were cloned into pGEX4T-1 and pET28a+ for bacterial expression of GST and His tagged expression or into a custom-made pcDNA3-based plasmid encoding an in-frame fusion with a c-MYC epitope tag at its N-terminus. GST-fused tandemly repeated UBA domain (3x UBA) derived from human ubiquilin was created by multiple overlap-extension PCR reactions and cloned into pGEX4T-1. Human Fz4 was

cloned into a custom-made pcDNA3-based plasmid for expression of a C-terminally eGFP-tagged chimera in mammalian cells. HA-Dvl2 was derived from mouse cDNA by RT-PCR and cloned into a pcDNA3-based plasmid encoding an in-frame fusion with the HA epitope tag. Site-directed mutants were created using the QuickSite mutagenesis kit (Qiagen Inc., Hilden, Germany) according to the manufacturer's instructions. All constructs were verified by dsDNA sequencing (MWG). FLAG-Ubiquitin and FLAG-Ubiquitin7R were kind gifts of Dr. Klaus-Peter Knobeloch (University of Freiburg, Germany). The plasmid encoding human Itch was a kind gift of Dr. Annie Angers (University of Montreal, Canada).

### **Antibodies**

HA (clone HA.11, Babco/Convance), FLAG (M2, Sigma), actin (clone AC-15, Sigma), clathrin heavy chain (clone TD.1), GFP for western blot detection (Abcam, AB6556), GFP for coimmunoprecipitations (Stressgen, cat. no. SAB500E), Itch (BD transduction, cat. no. 611198), Gadkin (own), EEA1 (BD transduction, cat. no. 610456), AP-3 (SA4, Hybridomabank and dS40, a kind gift from Prof. Stefan Höning (Univ. of Cologne, Germany). Secondary antibodies were purchased from Molecular Probes (AlexaFluor<sup>430</sup>, AlexaFluor<sup>488</sup>, AlexaFluor<sup>568</sup>, AlexaFluor<sup>647</sup>) or Dianova (HRP-coupled antibodies).

Polyclonal antibodies against PI4KII $\alpha$  were raised in rabbits by injecting 2 different peptides. Antisera were tested for specificity and affinity-purified on GST-PI4KII $\alpha$  cross-linked to GST-beads.

### **siRNAs sequences**

PI4KII $\alpha$ 1:GGAUCAUUGCUGUCUCAA;

PI4KII $\alpha$ 2:AAGAGGACCUAUAUGAACUCUUAAGA;

Itch: GGAGCAACAUCUGGAUUA; Control: GUAACUGUCGGCUCGUGGU

## Peptides

PI4KII $\alpha$  PPxY : NH<sub>2</sub>-PERAQPPEYTFPSG-COOH

Control: NH<sub>2</sub>-CQPARQGQAAPAQAQSSQ-COOH

## Cell culture and transfections

Cells were grown in Dulbecco's modified Eagle's medium (Invitrogen) supplemented with fetal calf serum and antibiotics. Protein expression in stably transfected Hek293 Flip-in cell lines was induced by addition of 1 $\mu$ g/ml doxycyclin. Lipofectamine2000 was used for plasmid transfections, Oligofectamine for transfection of siRNA (both from Invitrogen Inc.).

## Immunoprecipitation

Cells were lysed in extract buffer (20 mM Hepes pH 7.4, 100 mM NaCl or KCl, 2 mM MgCl<sub>2</sub>, 1% Triton X-100) supplemented with 1 mM PMSF and protease inhibitor cocktail (Sigma Inc., St. Louis, USA). For the analysis of phosphorylated proteins, phosphatase inhibitor cocktails were added (Sigma Inc., St. Louis, USA). Lysates were centrifuged at 20,000 xg, supernatants were collected ultracentrifuged for 15 min at 180,000 xg. Extracts were incubated with antibodies immobilized on protein A/G PLUS-agarose (Santa Cruz Biotechnology). Beads were washed with extract buffer and bound proteins were eluted with SDS-PAGE sample buffer.

To identify proteins preferentially associating with unmodified or ubiquitinated PI4KII $\alpha$  GST-PI4KII $\alpha$  was ubiquitinated *in vitro* as described below. Reaction mixes containing His<sub>6</sub>-Itch (WT) or His<sub>6</sub>-Itch (D830A) were supplemented with 40  $\mu$ l of agarose covalently coupled to anti-GST-IgG (SIGMA-Aldrich) and 1 ml of HeLa cell extracts and incubated for 4 h at 4°C. Beads were washed extensively and eluted with Laemmli sample buffer. Finally the eluates were separated by SDS-PAGE and analyzed by MS/MS-based mass spectrometry.

### **Tissue extracts and GST pulldowns**

Tissue extracts were prepared as described before (Kahlfeldt et al, 2010). Detergent extracts were pre-cleared by ultracentrifugation at 180,000 xg for 15 min. The pre-cleared supernatant was incubated with purified GST-tagged proteins for 2 h at 4°C on a rotating wheel, washed with 20 mM Hepes pH 7.4, 100 mM NaCl, 2 mM MgCl<sub>2</sub>, 1% Triton X-100 and bound proteins were either eluted with high salt buffer (20 mM Hepes pH 7.4, 1 M NaCl, 2 mM MgCl<sub>2</sub>) followed by TCA precipitation (large scale pulldown) or by addition of sample buffer.

### **Protein expression and purification**

His<sub>6</sub>-tagged or GST-tagged proteins were expressed in BL21 (DE3) and purified from *E. coli* using His-Select Nickel Affinity Gel (Sigma) or GST Bind Resin (Novagen) according to the manufacturer's instructions. For NMR GST-WW3 Itch was purified and subjected to thrombin cleavage. The GST tag was removed by collecting the flow through after running the GST-fused protein through a concentration spin column (10,000 MWCO, Vivaspin2, Sartorius Stedim Biotech). Purified WW3 was dialysed into a buffer containing 20 mM Tris pH 7 and 100mM NaCl.

### **PI 4-kinase activity assays**

1 µg purified His-PI4KIIα was incubated with or without 1.5 µg His<sub>6</sub>-WW1-4, 0.5 µg His<sub>6</sub>-WW3, 0.5 µg His<sub>6</sub>-WW4 of Itch, or 3 µg of His<sub>6</sub>-Itch (FL) in kinase buffer (25 mM Hepes/KOH pH7.2, 25 mM KCl, 2.5 mM MgOAc, 150 mM K-glutamate, 10 µM CaCl<sub>2</sub>, 0.2% CHAPS) containing 10 µg phosphatidylinositol (PI), 200 µM ATP and 10 µCi <sup>32</sup>P-γ-ATP for 5 min at 30° C. Lipids were extracted and analyzed by thin layer chromatography using appropriate standards. PI(4)P formation was quantified using phosphorimage analysis using a Cyclone Storage Phosphor Screen (Packard) and quantified using OptiQuant



Software.

### **Ubiquitination assays**

For *in vitro* ubiquitination assays 5 µg His<sub>6</sub>-Itch, His<sub>6</sub>-Itch (D830A) or FLAG-NEDD4.1 (BPS Bioscience) was incubated with 2.5 µg GST/His<sub>6</sub>-PI4KIIα or GST/His<sub>6</sub>-PI4KIIαSF in 100 µl reaction buffer containing 100 mM KCl, 20 mM Hepes pH 7.4, 2 mM MgCl<sub>2</sub>, 1 mM DTT, 4 mM ATP, 2 µg/ml E1 (UBE1, Boston Biochem), 2 µg/ml E2 (UbcH7, Boston Biochem) and 50 µg/ml mammalian ubiquitin (Boston Biochem). Samples were incubated for 30 min at 37° C and the reaction was stopped by addition of SDS-PAGE sample buffer. Samples were analyzed by SDS-PAGE and staining with Coomassie Blue or by immunoblotting.

### **Fz4 internalization**

HEK293 cells were transfected with siRNAs (two subsequent rounds on day 1 and day 3), followed by transfection with a plasmid encoding Fz4-eGFP and, if indicated, plasmids for rescue. Cells were seeded on glass coverslips o.n. and stimulated with media containing 400 ng/ml Wnt5a (R&D Systems) and 1 µM PMA (Calbiochem) for 40 min. Cells were processed for immunostaining and analyzed by spinning disc confocal microscopy under the control of Volocity software (Improvision Inc., UK). Fz4-eGFP uptake was quantified as the amount of Fz4-eGFP fluorescence accumulated in EEA1-positive endosomes normalized to the total amount of Fz4-eGFP present in the cell using Volocity software.

### **HA-Fz4 antibody uptake assay**

Inducible HekFlpIn/TR cells were stably transfected with a luminally HA-tagged Fz4 construct. Indicated target genes were silenced for 2 consecutive rounds. After the second

round of knockdown, cells were seeded onto matrigel-coated coverslips and HA-Fz4 expression was induced for 24 h with 1  $\mu\text{g}/\text{ml}$  doxycyclin. Next, coverslips were washed with medium and placed cell-side-down on parafilm on a drop of medium containing rat anti-HA antibody (Roche) for 1 h at 4  $^{\circ}\text{C}$ . Cells were washed and shifted to 37  $^{\circ}\text{C}$  in full medium for antibody internalization to occur for After 15 minutes, cells were washed and fixed with PFA. Non internalized (cell surface localized) rat-anti HA antibodies were blocked by incubation under non-permeabilizing with a saturating concentration of goat-anti-rat IgGs. After washing, cells were fixed once more with PFA and the internalized rat anti-HA IgGs were visualized with fluophore-conjugated anti-rat antibodies using standard immunofluorescence labeling protocols.

#### **Fz4 degradation assay**

Above described HA-Fz4 HekFlpIn/TR cells were silenced for 2 consecutive rounds and HA-Fz4 expression was induced by adding 5  $\text{ng}/\text{ml}$  doxycyclin. After 6 h, cells were washed once with full medium and further cultured in the presence of 10  $\mu\text{g}/\text{ml}$  cycloheximide to prevent further HA-Fz4 synthesis. Cells were harvested at 0, 3, 6 and 9 h after doxycyclin removal. For harvesting, cells were washed once with PBS, placed on ice and lysis buffer (20 mM Hepes pH 7.4, 100 mM KCl, 2 mM  $\text{MgCl}_2$ , 1% Triton X-100, 1 mM PMSF, 0.3% protease inhibitor cocktail) was added. Cells were scraped, transferred to Eppendorf tubes and frozen till all time points were collected. Extracts were centrifuged for 30 min at 20,000  $\times g$ , the resulting supernatants subjected to Western blot analysis.

#### **Transferrin uptake**

Hek293 cells doubly transfected with siRNAs (on days 1 and 3) were seeded on glass coverslips 96 h post-transfection, starved for 1 h in serum-free media and stimulated for 10 min with media containing 25  $\mu\text{g}/\text{ml}$  transferrin AlexaFluor<sup>488</sup> (Molecular Probes). Cells were

washed, fixed and analyzed by quantitative epifluorescence microscopy under the control of Slidebook software (3i Inc., Göttingen).

### **Immunofluorescence microscopy**

Cells were seeded on coverslips and fixed with 4% PFA, 4% sucrose in PBS for 3 min followed by fixation with ice-cold methanol for 7 min. For colocalization studies using antibodies against AP-3 and PI4KII $\alpha$  cells were fixed with ice-cold methanol only; for analysis of Itch and AP-3 cells were fixed with PFA (10 min) only. Standard protocols were used for immunostaining. Images were acquired on a Zeiss Axiovert 200M-based spinning disc confocal microscope (Perkin Elmer Inc.) under the control of Velocity software (Improvision Inc.) or in the case of transferrin by epifluorescence microscopy under the control of Slidebook software (3i Inc., Göttingen).

### **Quantitative RT-PCR**

RNA was isolated from PI4K2 $\beta$ -silenced Cos7 cells with TRIzol (Invitrogen) according to the manufacturer's protocol. 1  $\mu$ g RNA was used for cDNA synthesis with SuperScript III reverse transcriptase (Invitrogen) and poly d(T) primer (Roche). Product was diluted 1:10, 5  $\mu$ l was combined with either Axin2 (forward: TTATGCTTTGCACTACGTCCCTCCAAG, reverse: GACGCAACATGGTCAACCCTCAAGAC) or GAPDH primers (forward: GCAAATTCCATGGCACCGTCAAG, reverse: GCATCGCCCCACTTGATTTTGGAG) and SYBR Fast universal mix (KAPA biosystems). The qPCR reaction was performed on a Mx3005P qPCR system (Agilent Technologies).

### **Quantification of protein levels**

SiRNA-transfected Hek293 cell extracts were analyzed by immunoblotting using fluorescently labeled secondary antibodies for detection. Signals were detected using a Storm

Scanner (Molecular Dynamics) and quantified using ImageQuant5.2 software (Molecular Dynamics).

### **Protein identification by MS/MS-based mass spectrometry**

Sample preparation, in-gel digestion, and liquid chromatography/tandem mass spectrometry (LC-MS/MS) analysis were done as described (Lange et al, 2010). In brief, Coomassie-stained gel bands were cut into slices and tryptic in-gel digestions were performed in the presence of H<sub>2</sub><sup>18</sup>O (Campro Scientific GmbH, 97% <sup>18</sup>O) and H<sub>2</sub><sup>16</sup>O for material purified by GST and GST-PI4KII $\alpha$  preparations respectively. LC-MS/MS analyses were performed on a LTQ-Orbitrap hybrid mass spectrometer (Thermo Fisher) equipped with an Eksigent 2D nanoflow LC system (Axel Semrau GmbH). Mass spectra were acquired in a data-dependent mode. The dynamic exclusion time (for precursor ions) was set to 120 sec and automatic gain control was set to 1 x 10<sup>6</sup> and 20,000 for Orbitrap-MS and LTQ-MS/MS scans, respectively. The generated peak lists and the MASCOT server (version 2.2, Matrix Science) were used to search against the SwissProt database (version 56.2, contains 398,181 sequences, comprising 143,572,911 residues). A maximum of two missed cleavages was allowed, and the mass tolerance of precursor and sequence ions was set to 10 ppm and 0.35 Da, respectively. Acrylamide modification of cysteine and methionine oxidation were considered as possible modifications. Scaffold (version 2.02, Proteome Software Inc.) was used to validate MS/MS based peptide and protein identifications. Protein identifications were accepted if they could be established at greater than 99.0% probability and contained at least 2 identified peptides. Quantification was carried out using the Mascot Distiller Quantitation Toolbox (version 2.2.1.2, Matrix Science Ltd., London) and was based on calculations of <sup>16</sup>O/<sup>18</sup>O isotope intensity ratios of at least two identified peptides.

For the experiment shown in suppl. table 1 sample preparation, in-gel digestion, and protein identification and relative quantification were done as described above with the

exception that LC-MS/MS analyses were performed on an Orbitrap Elite hybrid mass spectrometer (Thermo Fisher, Bremen, Germany). Stable isotope labeling was performed during tryptic digestion in the presence of H<sub>2</sub><sup>18</sup>O (Campro Scientific GmbH, 97% <sup>18</sup>O) and H<sub>2</sub><sup>16</sup>O for proteins from the non-ubiquitinated and ubiquitinated pull-down respectively.

### **Nuclear Magnetic Resonance**

NMR spectra were recorded on Bruker AV700 MHz equipped with triple-resonance cryoprobes. <sup>1</sup>H-<sup>15</sup>N Heteronuclear Single Quantum Coherence (HSQC) spectra of <sup>15</sup>N labeled Itch WW3 with or without peptide PPXY were measured at 300 K applying a protein concentration of 120 μM. Buffer conditions were 100 mM NaCl, 20 mM Tris and pH 7. Spectra were subsequently processed and overlaid using Topspin (Bruker) and CCPNMR Analysis software (Vranken et al, 2005). Assignment by Shaw et al. (Shaw et al, 2005) was downloaded from the Biological Magnetic Resonance Data Bank (Ulrich et al, 2008).

### **Statistics**

Statistics were done using the unpaired t-test for all quantified experiments with the following exceptions. Kinase assays and qRT-PCR experiments were assessed with a paired t-test. For the data shown in Figs. 3B and 3J (no peptide vs. peptide -treated samples) a one-sample t-test was used.

### ***Supplementary references***

Kahlfeldt N, Vahedi-Faridi A, Koo SJ, Schafer JG, Krainer G, Keller S, Saenger W, Krauss M, Haucke V (2010) Molecular basis for association of PIPKI gamma-p90 with clathrin adaptor AP-2. *J Biol Chem* **285**: 2734-2749

Lange S, Sylvester M, Schumann M, Freund C, Krause E (2010) Identification of phosphorylation-dependent interaction partners of the adapter protein ADAP using quantitative mass spectrometry: SILAC vs (18)O-labeling. *J Proteome Res* **9**: 4113-4122

Shaw AZ, Martin-Malpartida P, Morales B, Yraola F, Royo M, Macias MJ (2005) Phosphorylation of either Ser16 or Thr30 does not disrupt the structure of the Itch E3 ubiquitin ligase third WW domain. *Proteins* **60**: 558-560

Ulrich EL, Akutsu H, Doreleijers JF, Harano Y, Ioannidis YE, Lin J, Livny M, Mading S, Maziuk D, Miller Z, Nakatani E, Schulte CF, Tolmie DE, Kent Wenger R, Yao H, Markley JL (2008) BioMagResBank. *Nucleic Acids Res* **36**: D402-408

Vranken WF, Boucher W, Stevens TJ, Fogh RH, Pajon A, Llinas M, Ulrich EL, Markley JL, Ionides J, Laue ED (2005) The CCPN data model for NMR spectroscopy: development of a software pipeline. *Proteins* **59**: 687-696

### ***Legends to supplementary figures***

#### **Supplementary figure S1: Identification of Itch as a PI4KII $\alpha$ -binding protein by MS/MS-based proteomic analysis**

(A) Coomassie gel of proteins purified from rat brain extract on a GST-PI4KII $\alpha$  matrix. GST incubated with rat brain extract or GST-PI4KII $\alpha$  in the absence of extract was used as control.

(B) Itch protein sequence; peptides identified by MS/MS analysis are highlighted in yellow.

(C) Selection of proteins identified in the large scale pulldown shown in A by MS/MS-based

mass spectrometry. **(D)** Cell extract of HEK293 cells stably expressing HA-PI4KII $\alpha$  were incubated with a matrix containing either GST-fused WW1-4 domains of Nedd4.1 or Nedd4.2. WW1-4 domains of both Nedd4-variants bind to HA-PI4KII $\alpha$ , but not to Gadkin (negative control). **(E)** Antibody against endogenous Itch co-immunoprecipitates HA-PI4KII $\alpha$  from an extract prepared from HEK293 cells stably expressing HA-PI4KII $\alpha$ . **(F)** Extract prepared from HEK293 cells stably expressing HA-PI4KII $\alpha$  was incubated with individual GST-fused WW domains of Itch. WW1, WW2 and WW3 bind HA-PI4KII $\alpha$ , whereas WW4 does not. Arrowhead indicates brain-specific background band.

### **Supplementary figure S2: PI4KII $\alpha$ and Itch localization**

**(A-F)** Confocal images of HeLa cells immunostained for the indicated endogenous proteins. Scale bar, 12  $\mu$ m. **(G-L)** Fluorescence intensities of lines shown in (A-F) plotted over distance. **(M)** Pearson correlations of data shown in (A-F).

### **Supplementary figure S3: Itch negatively regulates PI4KII $\alpha$ activity**

Analysis of PI4KII $\alpha$ -mediated PI(4)P synthesis using PI and  $\gamma$ -<sup>32</sup>P-ATP as substrates. Lipid products were separated by TLC and analyzed by phosphoimaging. **(A)** Production of PI(4)P by His<sub>6</sub>-PI4KII $\alpha$  increases in a time-dependent manner. Data were normalized to the average amount of PI(4)P generated within 15, 20, and 25 min. Individual data points represent the mean of two independent experiments. **(B)** Linear correlation between the production of PI(4)P and the amount of His<sub>6</sub>-PI4KII $\alpha$  present during the assay. Data were normalized to the amount of PI(4)P generated by 1  $\mu$ g of PI 4-kinase. **(C)** Mutation of the PPxY-motif does not impair the catalytic activity of His<sub>6</sub>-PI4KII $\alpha$ . **(D)** The activity of His<sub>6</sub>-PI4KII $\alpha$  is inhibited upon addition of His<sub>6</sub>-tagged WW1-4 domains of Itch in a dose-dependent manner (molar ratios: 1:1, 1:5 and 1:15). Full-length His<sub>6</sub>-Itch is almost as efficient in inhibiting His<sub>6</sub>-

PI4KII $\alpha$  as the WW-domains alone. Data were derived from two independent experiments and normalized to the amount of PI(4)P generated by His<sub>6</sub>-PI4KII $\alpha$  in absence of Itch. **(E)** Multi-ubiquitination of His<sub>6</sub>-PI4KII $\alpha$  by Itch does not affect its kinase activity. *(Left)* Western blot analysis of samples derived from *in-vitro*-ubiquitination experiments using a PI4KII $\alpha$ -specific antibody. Ubiquitinated PI4K-II $\alpha$  is only generated in presence of wild-type Itch, but not in presence of the catalytically inactive mutant C830A. *(Right)* Aliquots derived from the ubiquitination reactions were subjected to kinase activity assays. Data were normalized to the amount of PI(4)P synthesized by unmodified His<sub>6</sub>-PI4KII $\alpha$ , i.e. kinase preincubated in presence of His<sub>6</sub>-Itch(C830A); n = 3.

**Supplementary figure S4:**

**(A)** Working model describing the function of PI4KII $\alpha$  and Itch in degradative sorting of the Wnt receptor Fz4. See main manuscript for details. **(B)** HeLa cells were transfected with eGFP-PI4KII $\alpha$  and stained for endogenous Itch. Inset values represent Pearson's correlation of Itch and trans-Golgi network marker TGN46 (mean  $\pm$ SD). eGFP-PI4KII $\alpha$  overexpression results in increased localization of Itch to perinuclear membranes. Scale bar, 12  $\mu$ m. **(C)** Confocal images of HEK293 cells overexpressing HA-Dvl2 and mRFP-PI4KII $\alpha$  stained with antibodies against HA (Dvl2) and endogenous Itch. Scale bar, 10  $\mu$ m. **(D)** Analysis of mean GFP fluorescence per cell. Cells express eGFP-PI4KII $\alpha$  WT, SF and D308A at equal levels. Supplementary to figure 4C. **(E)** Representative example of immublot used for quantification in fig. 4G. **(F)** HeLa cells were silenced with the indicated siRNAs and allowed to internalize Alexa488-labeled-transferrin for 10 min (mean $\pm$ SEM). Transferrin uptake is not affected by PI4KII $\alpha$  silencing.



| Function                | Accession   | Ratio unmod/modified | SD(geo) | #peptides <sup>a</sup> | Protein ID                                                    |
|-------------------------|-------------|----------------------|---------|------------------------|---------------------------------------------------------------|
| DUB / endosomal sorting | IPI00000728 | <b>0.07</b>          | 1.32    | 18                     | USP15 Isoform 1 of Ubiquitin carboxyl-terminal hydrolase 15   |
|                         | IPI00023191 | <b>0.11</b>          | 1.03    | 2                      | TOM1 cDNA FLJ54710, highly similar to Target of Myb protein 1 |
|                         | IPI00021048 | <b>0.16</b>          | 1.96    | 6                      | MYOF Isoform 1 of Myoferlin                                   |
| actin dynamics          | IPI00328571 | <b>0.74</b>          | 1.56    | 9                      | WASH3P Actin nucleation promoting factor                      |
|                         | IPI00029175 | <b>1.09</b>          | 1.04    | 32                     | KIAA0196 WASH complex subunit strumpellin                     |
|                         | IPI00792422 | <b>1.30</b>          | 1.16    | 12                     | FAM21A Isoform 1 of WASH complex subunit FAM21A               |
| endocytosis             | IPI00045219 | <b>3.02</b>          | 2.01    | 6                      | SNX18 Isoform 1 of Sorting nexin-18                           |
|                         | IPI00019169 | <b>6.93</b>          | 1.20    | 5                      | SH3GL1 cDNA, Homo sapiens SH3-domain GRB2-like 1 (SH3GL1)     |
|                         | IPI00019171 | <b>7.06</b>          | 1.54    | 3                      | SH3GL2 Endophilin-A1                                          |
|                         | IPI00001883 | <b>7.22</b>          | 1.15    | 4                      | SNX9 Sorting nexin-9                                          |

**Supplementary Table 1:** Quantitative proteomic analysis of proteins associated with unmodified (heavy) vs. ubiquitin-modified (light) GST-PI4KII $\alpha$  from HeLa cell extracts. Proteins preferentially binding to ubiquitinated PI4KII $\alpha$  display a low heavy/ light isotope ratio and are highlighted in green. <sup>a</sup>Number of identified peptides used for relative quantification

# Figure S1

**A**

|                   |   |   |   |
|-------------------|---|---|---|
| GST               | + | - | - |
| GST-PI4KIIa       | - | + | + |
| rat brain extract | + | + | - |

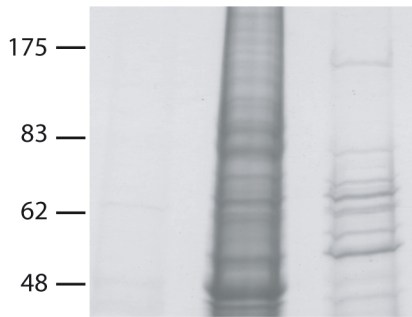

**B**

ITCH\_HUMAN (100%), 102.805,1 Da  
 sp|Q96J02|ITCH\_HUMAN E3 ubiquitin-protein ligase Itchy homolog  
 10 unique peptides, 10 unique spectra, 11 total spectra, 124/903 amino acids (14% coverage)

```

M S D S G S Q L G S   M G S L T M K S Q L   Q I T V I S A K L K   E N K K N W F G P S
F R V W S H Q T L K   S K K T E K C N N T   N S P K W K Q P L T   V I V T P V S K L L H
Q L G G D K E P T E   S D V L L L G T A A L   D I Y E T L K S N N   M K L E E V V V T L
S L L C L P R L E C   T I G D L S I C L D   G L Q L E S E V V T   N G E T T C S E N G
A S Q N D D G S R S   N S A I S A H C N L   C L P G L S D S G P I   E N S R R V A G F T G
P S L S N G G F K P   K D E T P R V S T N G   S D D P E D A G A G   N G S P S A T S E S
D G S S T A P L P P   T N T N R P S R P P   P P T P R R P A S V   I S G G S G P R P L
N P V T Q A P L P P   G W E Q R V D Q H F   A T S G L I I P L T   R T T W D R P E P L
P P C W E R R V D N   M G R I Y V D H F   R V Y Y V D H V E K   L E S V R N Y E Q W
Q L O R S Q L Q G A   M Q Q F N Q R F I Y   T R T T T W Q R P T   L E S E F D P L G P L
P E G W E M R T D S   N G R V Y F V N H N   T R I T T Q W E D P R   S K G E F D P L G P L
Q I A Y V R D F K A   K V Q Y F R F W C Q   R R T T T Y I D P R   T G K S A L D N G P
S F Q Q I M S F S P   Q D L R R R L W V I   F P G E E G L D Y G   G V A R E W F F L L
S H E V L N P M Y C   L F E Y A G K D N Y   C L Q I N P A S Y I   N P D H L K Y F R F
I G R F I A M A L F   H G K F I D T G F S   L P F Y K R I L N K   P V G L K D L E S I
D P E F Y N S L I W   V K E N N I E C D   L E M Y F S V D K E   I L G E I K S H D L
K P N G G N I L V T   E E N K E E Y I R M   V A E W R L S R G V   E E Q T Q A F F E G
F N E I L P Q Q Y L   Q Y F D A K E L E V   L L C G M Q E I D V   N D W Q R H A I Y R
H Y A R T S K Q I M   W F W Q F V K E I D   N E K R M R L L Q F   V T G T C R L P V G
G F A D L G S N G   P Q K F C I E K V G   K E N W L P R S H T   C F N R L D L P P Y
K S Y E Q L K E K L   L F A I E E T E G F   G Q E
  
```

**C**

| Protein name                                                               | number of unique peptides | % sequence coverage |
|----------------------------------------------------------------------------|---------------------------|---------------------|
| sp O9JME5 AP3B2_MOUSE AP-3 complex subunit beta-2                          | 38                        | 38                  |
| sp O54774 AP3D1_MOUSE AP-3 complex subunit delta-1                         | 24                        | 23                  |
| sp P62990 UBIQ_BOVIN Ubiquitin                                             | 2                         | 33                  |
| sp Q6ZPJ3 UBE2O_MOUSE Ubiquitin-conjugating enzyme E2 O                    | 21                        | 19                  |
| sp P70398 USP9X_MOUSE Probable ubiquitin carboxyl-terminal hydrolase FAF-X | 40                        | 17                  |
| sp Q96J02 Itch_HUMAN E3 ubiquitin-protein ligase Itchy homolog             | 10                        | 14                  |
| sp O00203 AP3B1_HUMAN AP-3 complex subunit beta-1                          | 6                         | 14                  |
| sp Q62940 NEDD4_RAT E3 ubiquitin-protein ligase NEDD4                      | 5                         | 6                   |
| sp Q9H0M0 WWP1_HUMAN NEDD4-like E3 ubiquitin-protein ligase WWP1           | 3                         | 4                   |

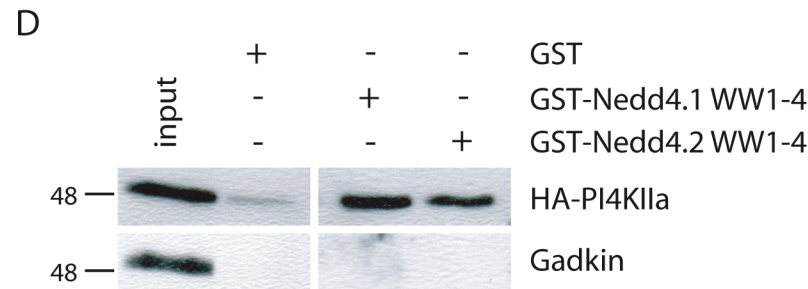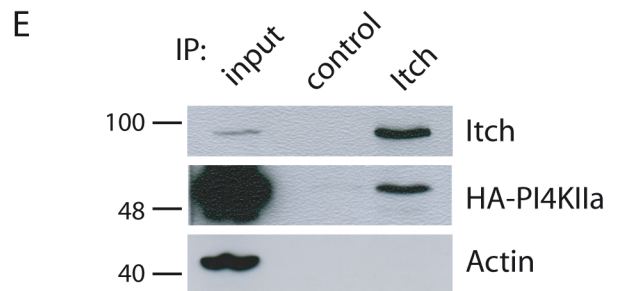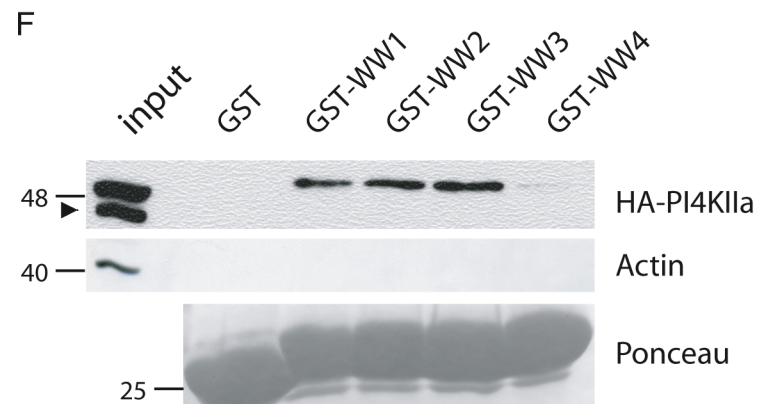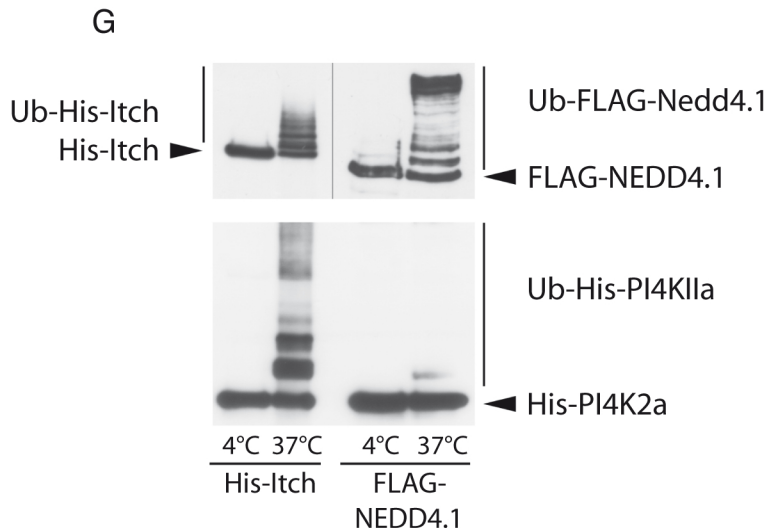

# Figure S2

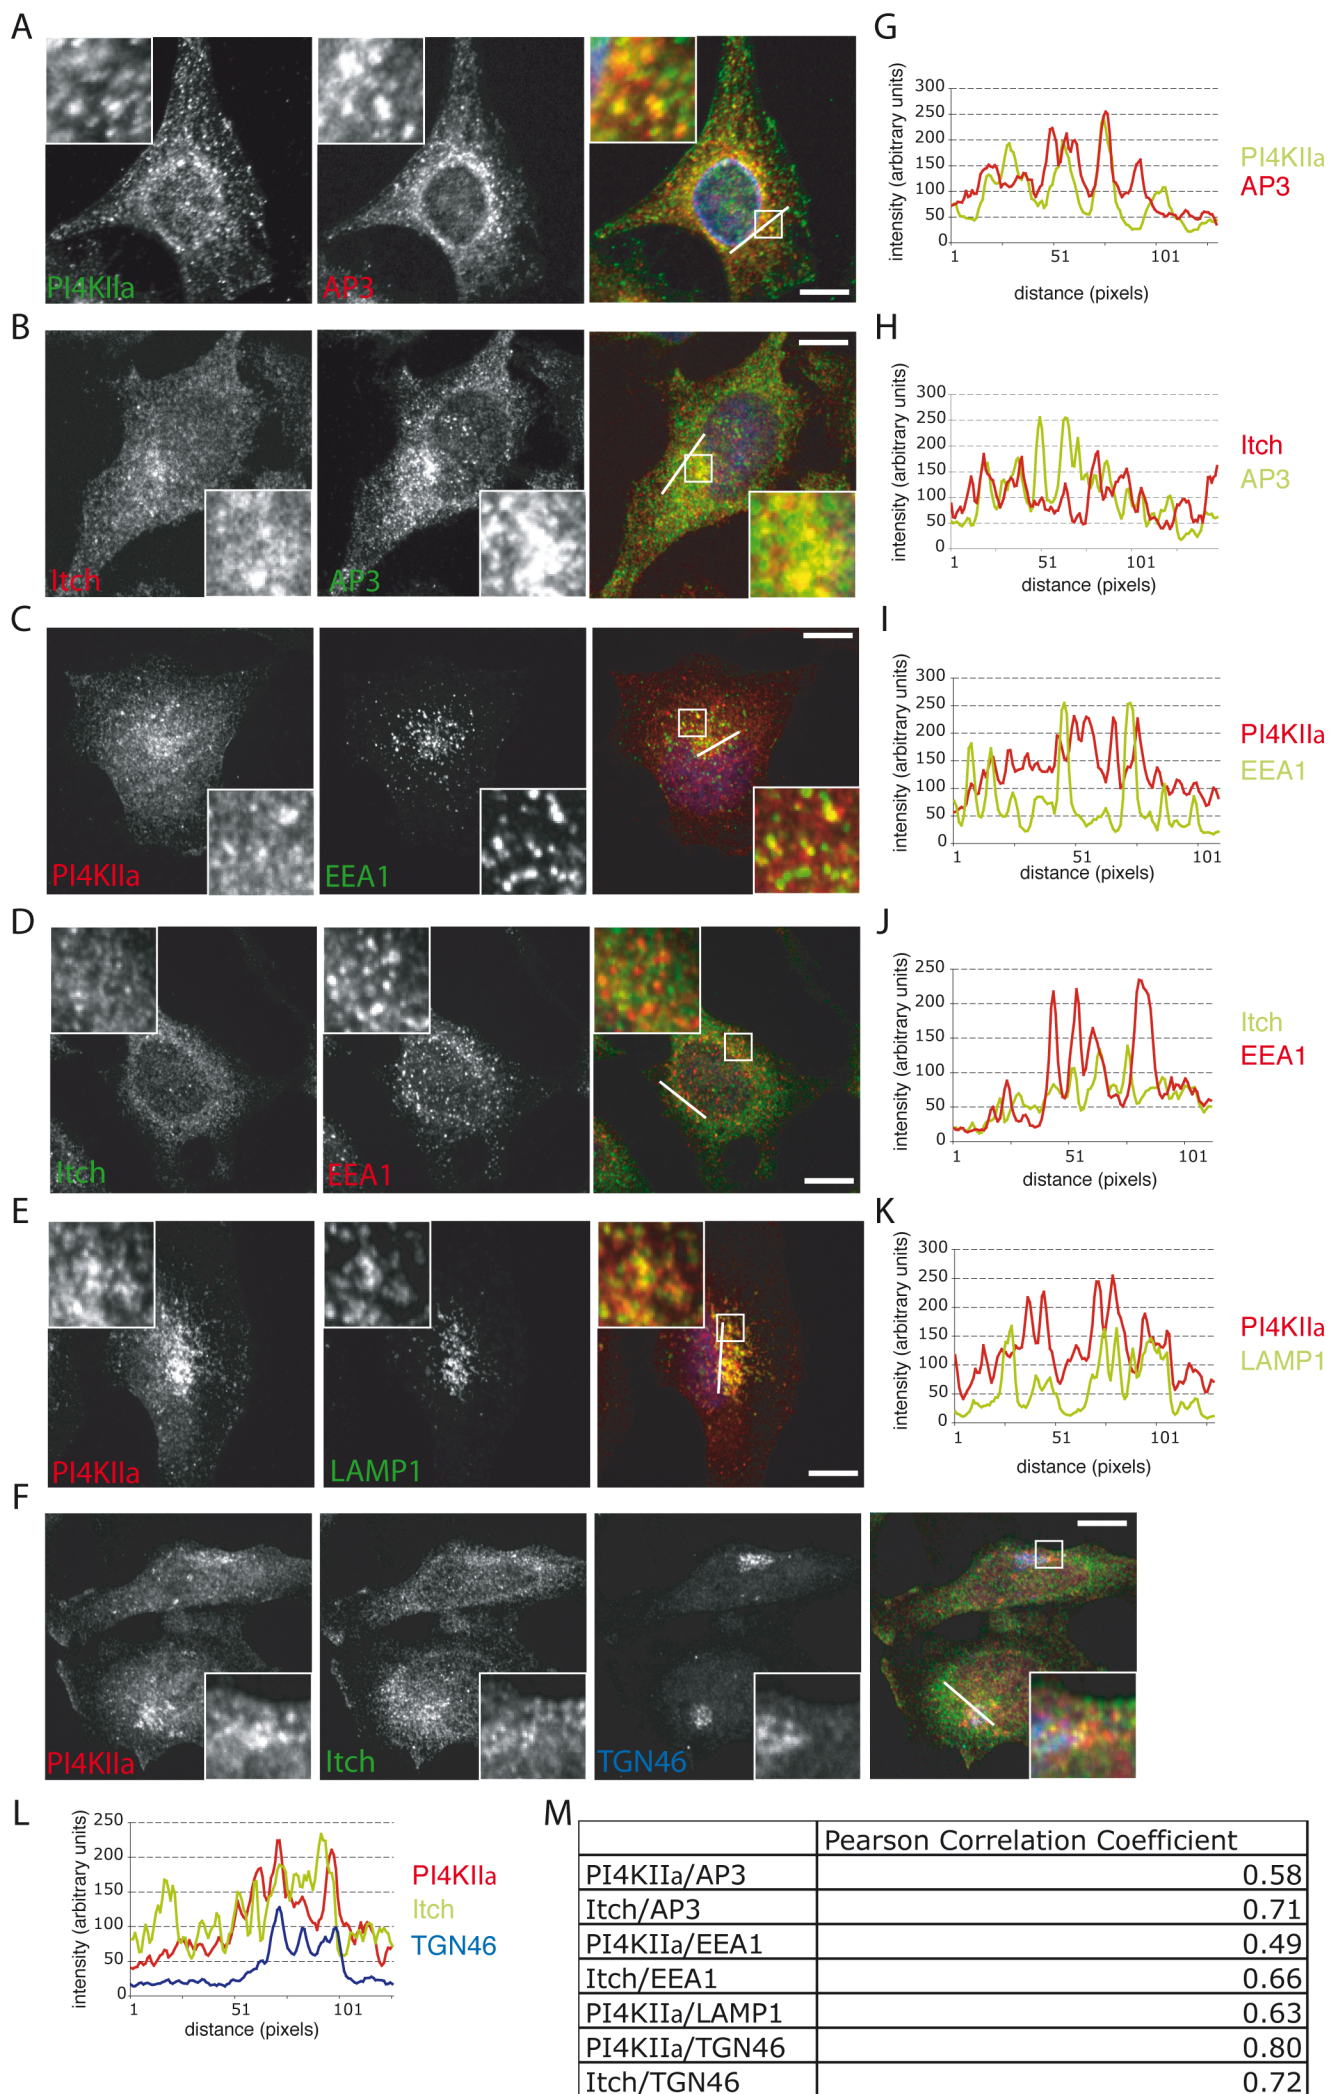



Figure S3

A

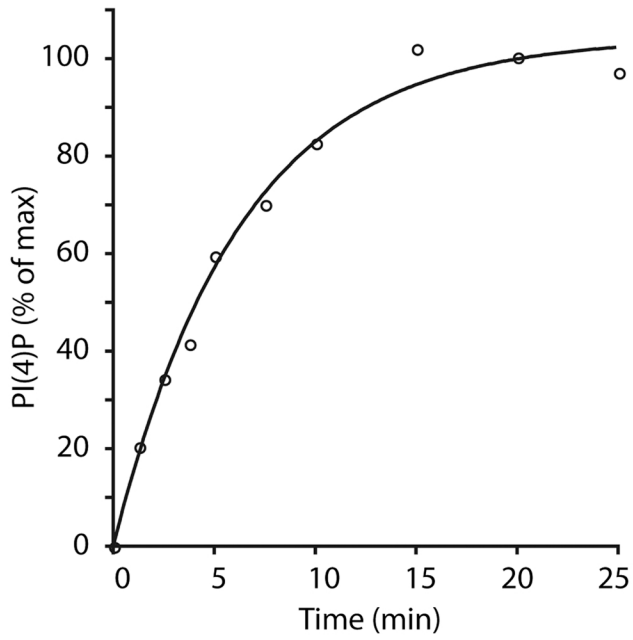

B

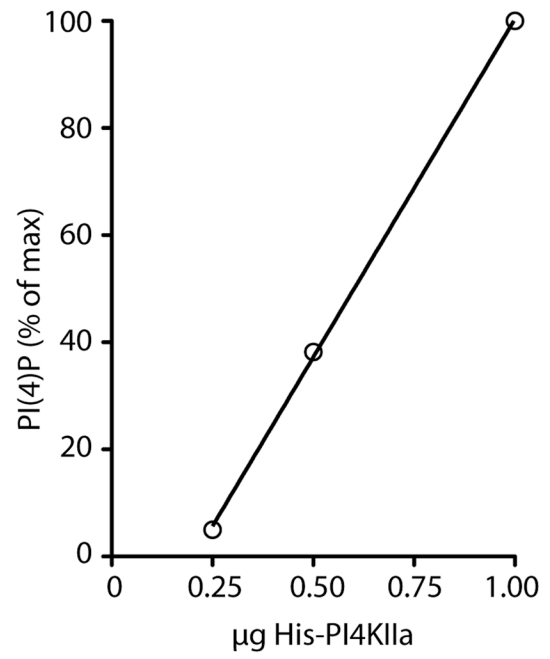

C

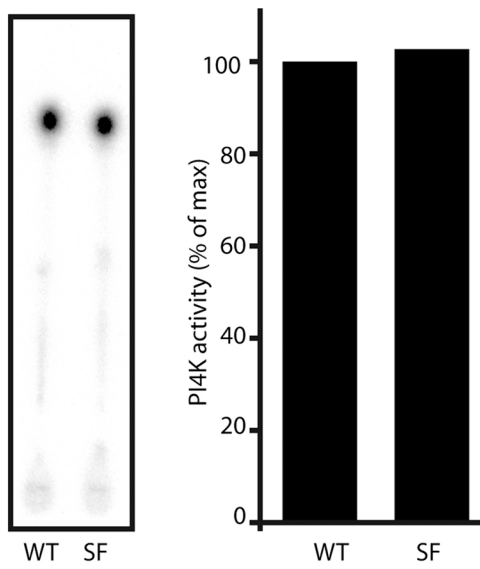

D

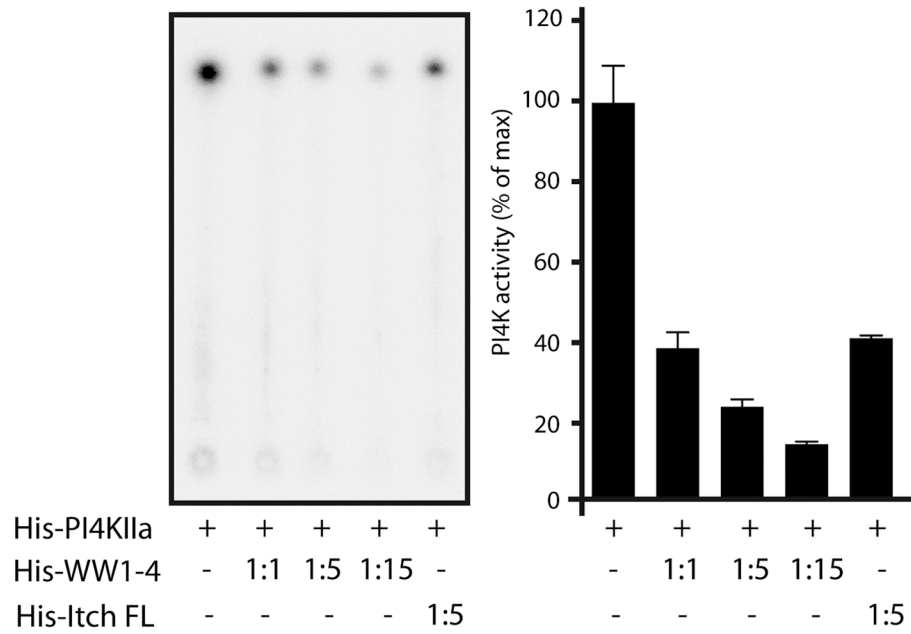

E

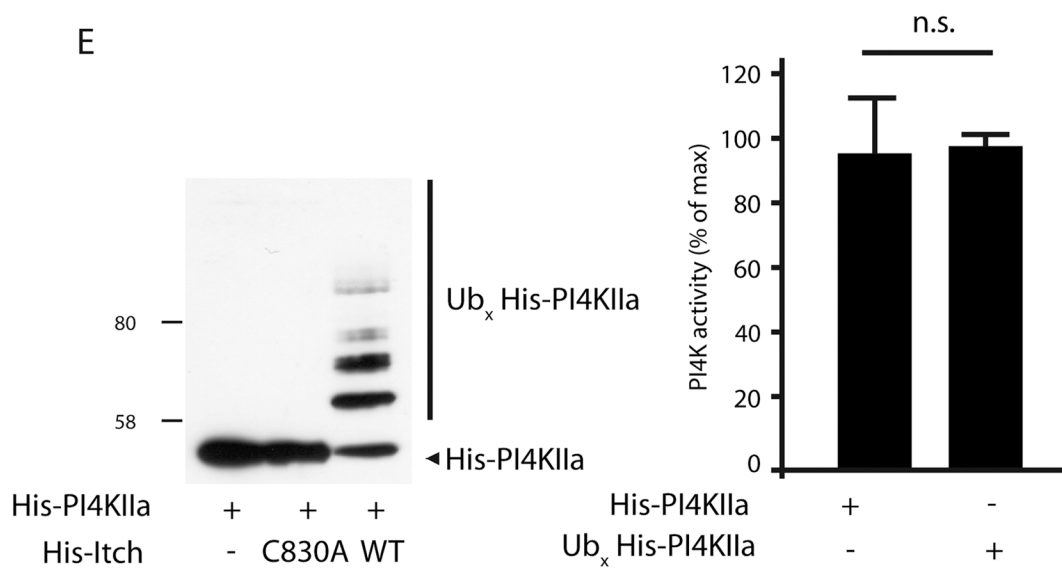

Figure S4

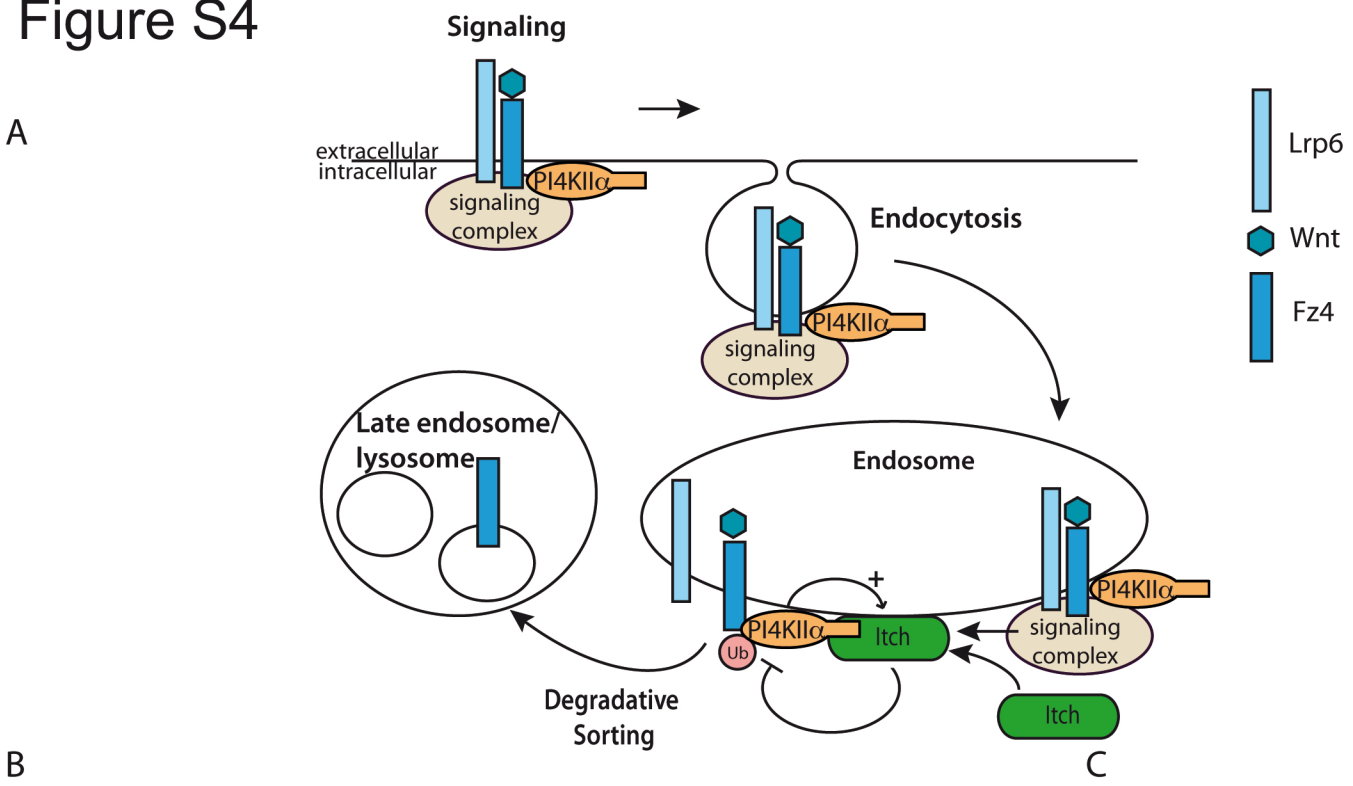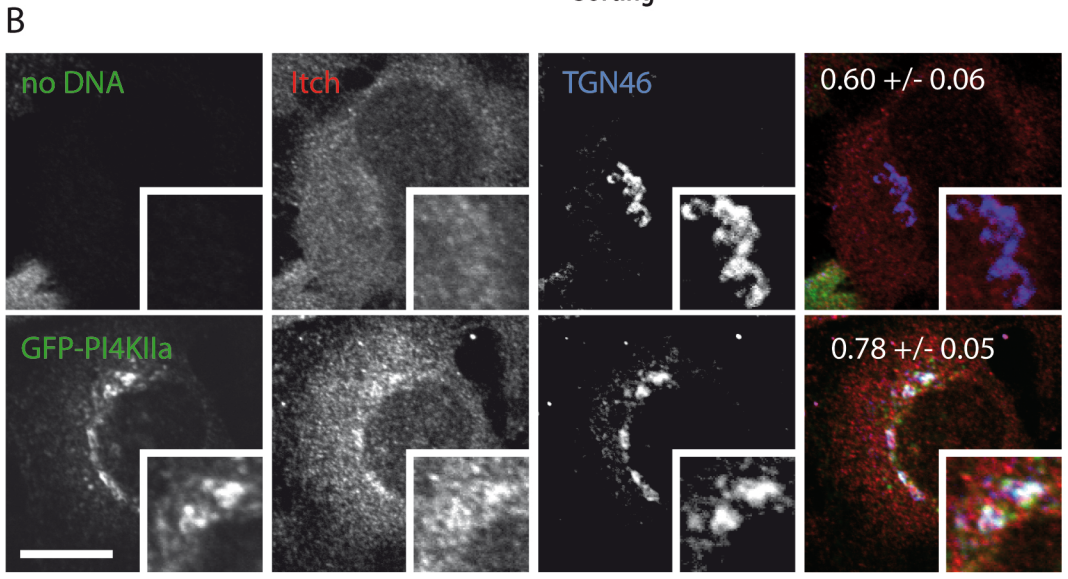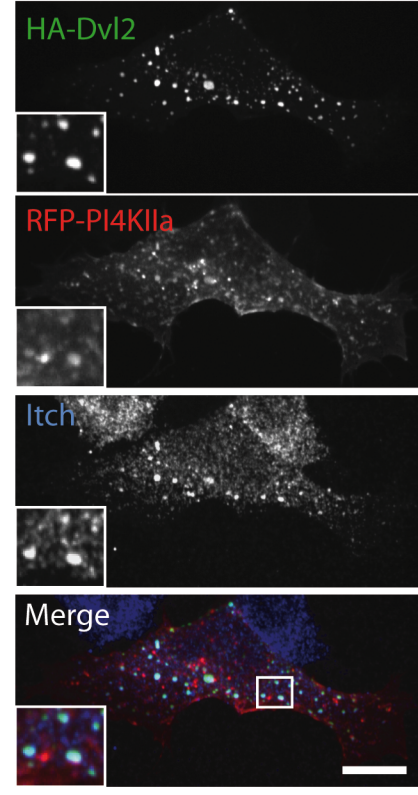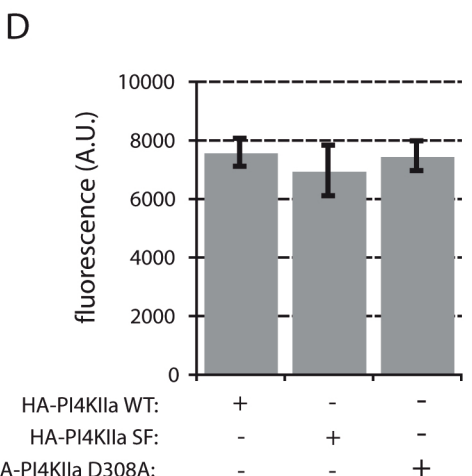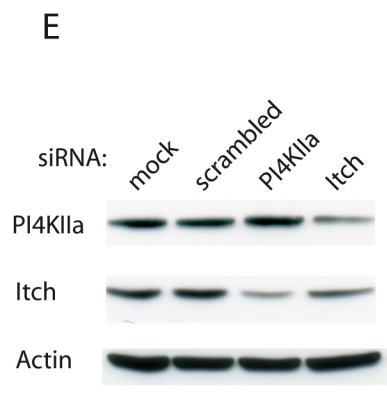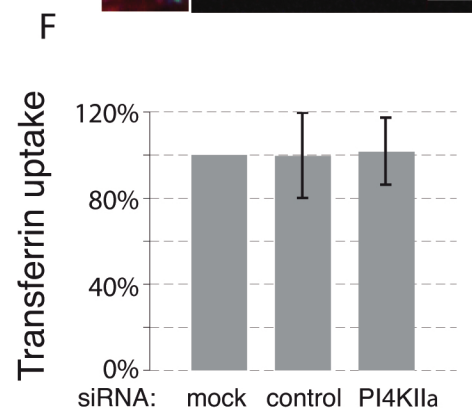

Supplement: embor2012164s1.pdf [file embor2012164s1.pdf]
